# Supplementary material for: Salivary Glands after Prolonged Aluminum Exposure: Proteomic Approach Underlying Biochemical and Morphological Impairments in Rats
Source: MDPI journal article supplement (doi:10.3390/ijms23042251), 2022-02-18
Supplement: s1 [file s1]

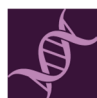

Supplementary Materials

**Salivary glands after prolonged aluminum exposure: proteomic approach underlying biochemical and morphological impairments in rats**

Deiweson Souza-Monteiro, Márcia Cristina dos Santos Guerra, Leonardo Oliveira Bittencourt, Walessa Alana Bragança Aragão, Aline Dionizio, Felipe Martins Silveira, Marília Afonso Rebeles Buzalaf, Manoela Domingues Martins, Maria Elena Crespo-Lopez, Rafael Rodrigues Lima

**Table S1.** Identified proteins with significant different status of regulation in the parotid glands of rats exposed to aluminum (Exposed group vs. Control group)

| Accession ID <sup>a</sup> | Protein Name                                             | PLGS    | Fold   |
|---------------------------|----------------------------------------------------------|---------|--------|
|                           |                                                          | Score   | Change |
| P47942                    | Dihydropyrimidinase-related protein 2                    | 67.84   | 15.64  |
| P54708                    | Potassium-transporting ATPase alpha chain 2              | 32.04   | 14.15  |
| Q64541                    | Sodium/potassium-transporting ATPase subunit alpha-4     | 32.04   | 14.15  |
| Q05511                    | Serine protease hepsin                                   | 126.6   | 5.47   |
| P07335                    | Creatine kinase B-type                                   | 161.62  | 5.16   |
| Q68FR8                    | Tubulin alpha-3 chain                                    | 1011.09 | 5.16   |
| P50398                    | Rab GDP dissociation inhibitor alpha                     | 56.32   | 5.05   |
| Q6P9V9                    | Tubulin alpha-1B chain                                   | 1190.77 | 4.85   |
| Q9Z2L0                    | Voltage-dependent anion-selective channel protein 1      | 68.45   | 4.57   |
| Q29RW1                    | Myosin-4                                                 | 20.35   | 4.01   |
| P00564                    | Creatine kinase M-type                                   | 69.39   | 3.9    |
| P48675                    | Desmin                                                   | 38.96   | 3.9    |
| P11980                    | Pyruvate kinase PKM                                      | 183.96  | 3.42   |
| P35704                    | Peroxiredoxin-2                                          | 130.15  | 3.35   |
| P50399                    | Rab GDP dissociation inhibitor beta                      | 65.89   | 3.32   |
| P09117                    | Fructose-bisphosphate aldolase C                         | 199.56  | 3.22   |
| O35412                    | Signal-induced proliferation-associated 1-like protein 1 | 294.34  | 3.19   |
| P07632                    | Superoxide dismutase [Cu-Zn]                             | 148.7   | 3.16   |
| P00507                    | Aspartate aminotransferase, mitochondrial                | 95.88   | 3.13   |

|               |                                                           |         |      |
|---------------|-----------------------------------------------------------|---------|------|
| <b>P10888</b> | Cytochrome c oxidase subunit 4 isoform 1, mitochondrial   | 117.42  | 3.1  |
| <b>P11442</b> | Clathrin heavy chain 1                                    | 46.33   | 2.8  |
| <b>P05065</b> | Fructose-bisphosphate aldolase A                          | 71.84   | 2.77 |
| <b>O88989</b> | Malate dehydrogenase, cytoplasmic                         | 171.18  | 2.69 |
| <b>P00406</b> | Cytochrome c oxidase subunit 2                            | 529.24  | 2.59 |
| <b>P0DP30</b> | Calmodulin-2                                              | 166.25  | 2.56 |
| <b>P16617</b> | Phosphoglycerate kinase 1                                 | 76.33   | 2.56 |
| <b>P0DP29</b> | Calmodulin-1                                              | 166.25  | 2.53 |
| <b>P0DP31</b> | Calmodulin-3                                              | 166.25  | 2.51 |
| <b>P11240</b> | Cytochrome c oxidase subunit 5A, mitochondrial            | 277.53  | 2.51 |
| <b>P35213</b> | 14-3-3 protein beta/alpha                                 | 125.06  | 2.48 |
| <b>P68511</b> | 14-3-3 protein eta                                        | 125.06  | 2.48 |
| <b>P68255</b> | 14-3-3 protein theta                                      | 125.06  | 2.48 |
| <b>P61983</b> | 14-3-3 protein gamma                                      | 125.06  | 2.46 |
| <b>O70417</b> | Prolactin-inducible protein homolog                       | 2677.87 | 2.46 |
| <b>P48500</b> | Triosephosphate isomerase                                 | 355.39  | 2.44 |
| <b>P21704</b> | Deoxyribonuclease-1                                       | 3766.11 | 2.41 |
| <b>P62260</b> | 14-3-3 protein epsilon                                    | 206.65  | 2.29 |
| <b>P63102</b> | 14-3-3 protein zeta/delta                                 | 419.94  | 2.23 |
| <b>P45592</b> | Cofilin-1                                                 | 380.9   | 2.16 |
| <b>P11030</b> | Acyl-CoA-binding protein                                  | 720.64  | 2.16 |
| <b>P04636</b> | Malate dehydrogenase, mitochondrial                       | 364.74  | 2.05 |
| <b>P06686</b> | Sodium/potassium-transporting ATPase subunit alpha-2      | 57.33   | 2.03 |
| <b>P06687</b> | Sodium/potassium-transporting ATPase subunit alpha-3      | 57.33   | 2.01 |
| <b>Q9ER34</b> | Aconitate hydratase, mitochondrial                        | 66.53   | 1.95 |
| <b>P17764</b> | Acetyl-CoA acetyltransferase, mitochondrial               | 117.63  | 1.86 |
| <b>Q9ESV6</b> | Glyceraldehyde-3-phosphate dehydrogenase, testis-specific | 86.11   | 1.82 |
| <b>P06685</b> | Sodium/potassium-transporting ATPase subunit alpha-1      | 68.7    | 1.72 |

|               |                                                |          |      |
|---------------|------------------------------------------------|----------|------|
| <b>O88767</b> | Protein/nucleic acid deglycase DJ-1            | 251.68   | 1.68 |
| <b>P15429</b> | Beta-enolase                                   | 33.13    | 1.65 |
| <b>Q05962</b> | ADP/ATP translocase 1                          | 57.97    | 1.63 |
| <b>P63029</b> | Translationally-controlled tumor protein       | 700.39   | 1.63 |
| <b>P50137</b> | Transketolase                                  | 74.27    | 1.6  |
| <b>P19944</b> | 60S acidic ribosomal protein P1                | 599.01   | 1.57 |
| <b>Q06647</b> | ATP synthase subunit O, mitochondrial          | 76.99    | 1.57 |
| <b>P04797</b> | Glyceraldehyde-3-phosphate dehydrogenase       | 1694.24  | 1.54 |
| <b>Q5XI73</b> | Rho GDP-dissociation inhibitor 1               | 105.87   | 1.54 |
| <b>P04642</b> | L-lactate dehydrogenase A chain                | 110.59   | 1.52 |
| <b>Q6AY56</b> | Tubulin alpha-8 chain                          | 775.22   | 1.52 |
| <b>Q63471</b> | BPI fold-containing family A member 2          | 3098.57  | 1.51 |
| <b>P56574</b> | Isocitrate dehydrogenase [NADP], mitochondrial | 123.58   | 1.48 |
| <b>Q6RY07</b> | Acidic mammalian chitinase                     | 10981.75 | 1.46 |
| <b>Q9WTT6</b> | Guanine deaminase                              | 108.74   | 1.43 |
| <b>P15999</b> | ATP synthase subunit alpha, mitochondrial      | 460.83   | 1.4  |
| <b>P38983</b> | 40S ribosomal protein AS                       | 409.09   | 1.38 |
| <b>P04764</b> | Alpha-enolase                                  | 511.54   | 1.36 |
| <b>P63018</b> | Heat shock cognate 71 kDa protein              | 775.94   | 1.35 |
| <b>P62083</b> | 40S ribosomal protein S7                       | 477.82   | 1.32 |
| <b>P06761</b> | Endoplasmic reticulum chaperone BiP            | 1280.33  | 1.32 |
| <b>Q6P9T8</b> | Tubulin beta-4B chain                          | 878.95   | 1.31 |
| <b>Q5XIF6</b> | Endoplasmin                                    | 397.33   | 1.3  |
| <b>P62630</b> | Elongation factor 1-alpha 1                    | 2887.93  | 1.28 |
| <b>Q66HD0</b> | Tubulin alpha-4A chain                         | 993.58   | 1.26 |
| <b>P04906</b> | Glutathione S-transferase P                    | 242.17   | 1.25 |
| <b>Q63716</b> | Peroxisredoxin-1                               | 264.94   | 1.25 |
| <b>P85108</b> | Tubulin beta-2A chain                          | 818.22   | 1.25 |

|               |                                                  |          |       |
|---------------|--------------------------------------------------|----------|-------|
| <b>Q4QRB4</b> | Tubulin beta-3 chain                             | 451.9    | 1.25  |
| <b>P18418</b> | Calreticulin                                     | 120.36   | 1.22  |
| <b>P68370</b> | Tubulin alpha-1A chain                           | 1194.16  | 1.22  |
| <b>Q3KRE8</b> | Tubulin beta-2B chain                            | 814.85   | 1.22  |
| <b>P69897</b> | Tubulin beta-5 chain                             | 915.07   | 1.22  |
| <b>P63039</b> | 60 kDa heat shock protein, mitochondrial         | 74.89    | 1.21  |
| <b>P12020</b> | Cysteine-rich secretory protein 1                | 7698.82  | 1.21  |
| <b>P0DMW0</b> | Heat shock 70 kDa protein 1A                     | 336.58   | 1.21  |
| <b>Q64057</b> | Alpha-aminoadipic semialdehyde dehydrogenase     | 207.59   | 1.2   |
| <b>P62632</b> | Elongation factor 1-alpha 2                      | 1272.4   | 1.2   |
| <b>P0DMW1</b> | Heat shock 70 kDa protein 1B                     | 336.58   | 1.2   |
| <b>P55063</b> | Heat shock 70 kDa protein 1-like                 | 336.58   | 1.2   |
| <b>P04785</b> | Protein disulfide-isomerase                      | 341.37   | 1.19  |
| <b>P10719</b> | ATP synthase subunit beta, mitochondrial         | 915.78   | 1.17  |
| <b>Q6AYZ1</b> | Tubulin alpha-1C chain                           | 1062.01  | 1.15  |
| <b>P10111</b> | Peptidyl-prolyl cis-trans isomerase A            | 2191.43  | 1.11  |
| <b>Q6P6Q2</b> | Keratin, type II cytoskeletal 5                  | 133.48   | -0.51 |
| <b>P00689</b> | Pancreatic alpha-amylase                         | 1733.1   | -0.52 |
| <b>P32551</b> | Cytochrome b-c1 complex subunit 2, mitochondrial | 39.23    | -0.54 |
| <b>Q6LED0</b> | Histone H3.1                                     | 774.82   | -0.6  |
| <b>P84245</b> | Histone H3.3                                     | 774.82   | -0.6  |
| <b>P02466</b> | Collagen alpha-2(I) chain                        | 138.73   | -0.62 |
| <b>P0C0S7</b> | Histone H2A.Z                                    | 3302.7   | -0.66 |
| <b>Q6IE52</b> | Murinoglobulin-2                                 | 97.41    | -0.66 |
| <b>P02091</b> | Hemoglobin subunit beta-1                        | 16061.07 | -0.7  |
| <b>P11517</b> | Hemoglobin subunit beta-2                        | 3174.66  | -0.7  |
| <b>Q63279</b> | Keratin, type I cytoskeletal 19                  | 191.73   | -0.71 |
| <b>Q64119</b> | Myosin light polypeptide 6                       | 303.88   | -0.71 |

|               |                                         |          |       |
|---------------|-----------------------------------------|----------|-------|
| <b>P02262</b> | Histone H2A type 1                      | 10690.25 | -0.72 |
| <b>P0C169</b> | Histone H2A type 1-C                    | 10690.25 | -0.72 |
| <b>P0C170</b> | Histone H2A type 1-E                    | 10690.25 | -0.72 |
| <b>Q4FZT6</b> | Histone H2A type 3                      | 10690.25 | -0.72 |
| <b>A9UMV8</b> | Histone H2A.J                           | 10690.25 | -0.72 |
| <b>P68035</b> | Actin, alpha cardiac muscle 1           | 7131.74  | -0.73 |
| <b>P68136</b> | Actin, alpha skeletal muscle            | 7057.67  | -0.73 |
| <b>P62738</b> | Actin, aortic smooth muscle             | 6437.13  | -0.73 |
| <b>P63269</b> | Actin, gamma-enteric smooth muscle      | 6437.13  | -0.73 |
| <b>Q64598</b> | Histone H2A type 1-F                    | 10690.25 | -0.73 |
| <b>P0CC09</b> | Histone H2A type 2-A                    | 10690.25 | -0.73 |
| <b>Q00728</b> | Histone H2A type 4                      | 10690.25 | -0.73 |
| <b>P60711</b> | Actin, cytoplasmic 1                    | 14760.75 | -0.74 |
| <b>P63259</b> | Actin, cytoplasmic 2                    | 14760.75 | -0.74 |
| <b>P02770</b> | Serum albumin                           | 10533.53 | -0.74 |
| <b>Q00729</b> | Histone H2B type 1-A                    | 2677.81  | -0.75 |
| <b>Q5BJY9</b> | Keratin, type I cytoskeletal 18         | 1256.79  | -0.76 |
| <b>P0CG51</b> | Polyubiquitin-B                         | 517.5    | -0.78 |
| <b>Q10758</b> | Keratin, type II cytoskeletal 8         | 2152.34  | -0.79 |
| <b>Q63429</b> | Polyubiquitin-C                         | 517.5    | -0.79 |
| <b>P12346</b> | Serotransferrin                         | 580.1    | -0.79 |
| <b>P62982</b> | Ubiquitin-40S ribosomal protein S27a    | 517.5    | -0.79 |
| <b>P62986</b> | Ubiquitin-60S ribosomal protein L40     | 517.5    | -0.79 |
| <b>P20760</b> | Ig gamma-2A chain C region              | 1255.75  | -0.82 |
| <b>P01946</b> | Hemoglobin subunit alpha-1/2            | 25408.2  | -0.84 |
| <b>Q00715</b> | Histone H2B type 1                      | 14623.03 | -0.89 |
| <b>P62804</b> | Histone H4                              | 12183.1  | -0.89 |
| <b>Q641X9</b> | 39S ribosomal protein L9, mitochondrial | 122.25   | -     |

|               |                                                    |        |   |
|---------------|----------------------------------------------------|--------|---|
| <b>Q9JKL8</b> | Activity-dependent neuroprotector homeobox protein | 40.46  | - |
| <b>O89046</b> | Coronin-1B                                         | 66.86  | - |
| <b>Q9JM01</b> | Cyclin-dependent kinase-like 3                     | 47.42  | - |
| <b>O35964</b> | Endophilin-A2                                      | 82.8   | - |
| <b>Q499U2</b> | Engulfment and cell motility protein 3             | 47.63  | - |
| <b>P31977</b> | Ezrin                                              | 31.89  | - |
| <b>Q00960</b> | Glutamate receptor ionotropic, NMDA 2B             | 28.32  | - |
| <b>D3ZIZ1</b> | GRAM domain-containing 2A                          | 66.87  | - |
| <b>D4A3K5</b> | Histone H1.1                                       | 38.92  | - |
| <b>P15865</b> | Histone H1.4                                       | 177.24 | - |
| <b>P06349</b> | Histone H1t                                        | 177.24 | - |
| <b>P20762</b> | Ig gamma-2C chain C region                         | 63.41  | - |
| <b>P01836</b> | Ig kappa chain C region, A allele                  | 653.96 | - |
| <b>P20767</b> | Ig lambda-2 chain C region                         | 93.45  | - |
| <b>F1LZ52</b> | Kelch-like protein 3                               | 55.87  | - |
| <b>Q6IMF3</b> | Keratin, type II cytoskeletal 1                    | 79.27  | - |
| <b>Q6IG01</b> | Keratin, type II cytoskeletal 1b                   | 79.27  | - |
| <b>Q4FZU2</b> | Keratin, type II cytoskeletal 6A                   | 79.27  | - |
| <b>Q6IG04</b> | Keratin, type II cytoskeletal 72                   | 79.27  | - |
| <b>Q6AYL9</b> | Kinetochore protein Nuf2                           | 48.53  | - |
| <b>P30349</b> | Leukotriene A-4 hydrolase                          | 70.99  | - |
| <b>P30919</b> | N(4)-(Beta-N-acetylglucosaminy)-L-asparaginase     | 65.27  | - |
| <b>O35260</b> | Nucleus accumbens-associated protein 1             | 30.54  | - |
| <b>P24368</b> | Peptidyl-prolyl cis-trans isomerase B              | 108.87 | - |
| <b>P21807</b> | Peripherin                                         | 61.32  | - |
| <b>Q63945</b> | Protein SET                                        | 206.16 | - |
| <b>P81128</b> | Rho GTPase-activating protein 35                   | 56.27  | - |
| <b>Q62868</b> | Rho-associated protein kinase 2                    | 46.84  | - |

|               |                                                          |        |   |
|---------------|----------------------------------------------------------|--------|---|
| <b>Q9Z220</b> | Testis-specific gene 10 protein                          | 29.82  | - |
| <b>B5DEL3</b> | Tetratricopeptide repeat protein 17                      | 39.23  | - |
| <b>P63312</b> | Thymosin beta-10                                         | 498.09 | - |
| <b>Q9EQS0</b> | Transaldolase                                            | 128.06 | - |
| <b>Q5U2W5</b> | Transducin beta-like protein 3                           | 49.32  | - |
| <b>Q64350</b> | Translation initiation factor eIF-2B subunit epsilon     | 58.14  | - |
| <b>D3ZFH6</b> | UBX domain-containing protein 440S ribosomal protein S3a | 56.11  | - |

<sup>a</sup>Accession ID according to Uniprot.org database. Positive and negative values of fold change, indicate up and downregulated proteins, respectively. Results of the comparison between aluminum group and control group. Signs of - indicate absence expression in the exposed group.

**Table S2.** Identified proteins with significant different status of regulation in the submandibular glands of rats exposed to aluminum (Exposed group vs. Control group)

| Accession ID <sup>a</sup> | Protein Name                         | <i>PLGS</i> | Fold   |
|---------------------------|--------------------------------------|-------------|--------|
|                           |                                      | Score       | Change |
| <b>P36375</b>             | Glandular kallikrein-10              | 374.62      | 1.43   |
| <b>P07647</b>             | Submandibular glandular kallikrein-9 | 321.87      | 1.42   |
| <b>P60711</b>             | Actin, cytoplasmic 1                 | 153.3       | 1.14   |
| <b>P63259</b>             | Actin, cytoplasmic 2                 | 153.3       | 1.14   |
| <b>P02091</b>             | Hemoglobin subunit beta-1            | 571.39      | -0.55  |
| <b>P11517</b>             | Hemoglobin subunit beta-2            | 447.55      | -0.59  |
| <b>P01946</b>             | Hemoglobin subunit alpha-1/2         | 1091.38     | -0.6   |
| <b>Q64598</b>             | Histone H2A type 1-F                 | 421.36      | -0.69  |
| <b>P0C170</b>             | Histone H2A type 1-E                 | 421.36      | -0.7   |
| <b>Q4FZT6</b>             | Histone H2A type 3                   | 421.36      | -0.7   |
| <b>Q00728</b>             | Histone H2A type 4                   | 421.36      | -0.7   |
| <b>P62804</b>             | Histone H4                           | 384.08      | -0.75  |
| <b>O70417</b>             | Prolactin-inducible protein homolog  | 781.02      | -0.88  |
| <b>P62246</b>             | 40S ribosomal protein S15a           | 75.79       | +      |

|               |                                                                          |        |   |
|---------------|--------------------------------------------------------------------------|--------|---|
| <b>P04644</b> | 40S ribosomal protein S17                                                | 533.72 | + |
| <b>P62083</b> | 40S ribosomal protein S7                                                 | 130.26 | + |
| <b>P38983</b> | 40S ribosomal protein SA                                                 | 232.16 | + |
| <b>P63039</b> | 60 kDa heat shock protein, mitochondrial                                 | 51.94  | + |
| <b>P19944</b> | 60S acidic ribosomal protein P1                                          | 741.43 | + |
| <b>P23358</b> | 60S ribosomal protein L12                                                | 105.16 | + |
| <b>P17764</b> | Acetyl-CoA acetyltransferase, mitochondrial                              | 130.35 | + |
| <b>Q9ER34</b> | Aconitate hydratase, mitochondrial                                       | 46.82  | + |
| <b>P11030</b> | Acyl-CoA-binding protein                                                 | 279.62 | + |
| <b>P15429</b> | Beta-enolase                                                             | 89.14  | + |
| <b>P18418</b> | Calreticulin                                                             | 69.26  | + |
| <b>P18886</b> | Carnitine O-palmitoyltransferase 2, mitochondrial                        | 39.64  | + |
| <b>P02454</b> | Collagen alpha-1(I) chain                                                | 38.15  | + |
| <b>P25809</b> | Creatine kinase U-type, mitochondrial                                    | 235.38 | + |
| <b>P07153</b> | Dolichyl-diphosphooligosaccharide--protein glycosyltransferase subunit 1 | 32.19  | + |
| <b>Q5XIL8</b> | Dynein intermediate chain 1, axonemal                                    | 50.59  | + |
| <b>P13803</b> | Electron transfer flavoprotein subunit alpha, mitochondrial              | 58.82  | + |
| <b>Q68FU3</b> | Electron transfer flavoprotein subunit beta                              | 115.73 | + |
| <b>P05197</b> | Elongation factor 2                                                      | 92.56  | + |
| <b>Q66HD0</b> | Endoplasmin                                                              | 49.99  | + |
| <b>P07323</b> | Gamma-enolase                                                            | 52.23  | + |
| <b>P09606</b> | Glutamine synthetase                                                     | 30.17  | + |
| <b>P04797</b> | Glyceraldehyde-3-phosphate dehydrogenase                                 | 377.03 | + |
| <b>P63018</b> | Heat shock cognate 71 kDa protein                                        | 62.79  | + |
| <b>P14659</b> | Heat shock-related 70 kDa protein 2                                      | 37.44  | + |
| <b>Q6LED0</b> | Histone H3.1                                                             | 183.65 | + |
| <b>P84245</b> | Histone H3.3                                                             | 183.65 | + |
| <b>P5674</b>  | Isocitrate dehydrogenase [NADP], mitochondrial                           | 109.56 | + |



|               |                                                     |        |   |
|---------------|-----------------------------------------------------|--------|---|
| <b>Q6IG12</b> | Keratin, type II cytoskeletal 7                     | 202.32 | + |
| <b>O88989</b> | Malate dehydrogenase, cytoplasmic                   | 119.16 | + |
| <b>Q9R063</b> | Peroxiredoxin-5, mitochondrial                      | 118.02 | + |
| <b>P62963</b> | Profilin-1                                          | 278.67 | + |
| <b>P11598</b> | Protein disulfide-isomerase A3                      | 58.71  | + |
| <b>Q62902</b> | Protein ERGIC-53                                    | 139.98 | + |
| <b>P11980</b> | Pyruvate kinase PKM                                 | 45.9   | + |
| <b>Q4QR99</b> | Queuine tRNA-ribosyltransferase catalytic subunit 1 | 59.01  | + |
| <b>P50398</b> | Rab GDP dissociation inhibitor alpha                | 32.99  | + |
| <b>P50399</b> | Rab GDP dissociation inhibitor beta                 | 42.49  | + |
| <b>Q6NYB7</b> | Ras-related protein Rab-1A                          | 174.7  | + |
| <b>Q5XI73</b> | Rho GDP-dissociation inhibitor 1                    | 210.91 | + |
| <b>P13432</b> | SMR1 protein                                        | 299.2  | + |
| <b>Q66X93</b> | Staphylococcal nuclease domain-containing protein 1 | 60.78  | + |
| <b>P68370</b> | Tubulin alpha-1A chain                              | 122.88 | + |
| <b>Q6P9V9</b> | Tubulin alpha-1B chain                              | 122.88 | + |
| <b>Q6AYZ1</b> | Tubulin alpha-1C chain                              | 122.88 | + |
| <b>Q68FR8</b> | Tubulin alpha-3 chain                               | 83.38  | + |
| <b>Q5XIF6</b> | Tubulin alpha-4A chain                              | 54.94  | + |
| <b>F1LNJ2</b> | U5 small nuclear ribonucleoprotein 200 kDa helicase | 20.79  | + |
| <b>Q6IG05</b> | Keratin, type II cytoskeletal 75                    | 36.89  | - |

<sup>a</sup>Accession ID according to Uniprot.org database. Positive and negative values of fold change, indicate up and downregulated proteins, respectively. Results of the comparison between aluminum group and control group. Signs of + and - indicate exclusive or absence expression in the exposed group, respectively.

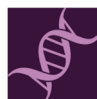

**Table S3.** Description of all analysis values of the study.

| Analyze                          | Description of unit | Mean (Control) | Mean (AlCl <sub>3</sub> ) | SD (Control) | SD (AlCl <sub>3</sub> ) | SEM (Control) | SEM (AlCl <sub>3</sub> ) | Power (1-β err prob) |
|----------------------------------|---------------------|----------------|---------------------------|--------------|-------------------------|---------------|--------------------------|----------------------|
| ACAP - Parotid gland             | % of control        | 100            | 57.79                     | 23.79        | 15.16                   | 8.993         | 5.73                     | 98.85%               |
| LPO - Parotid gland              | % of control        | 100            | 140.4                     | 15.87        | 22.07                   | 5.612         | 9.011                    | 98.76%               |
| ACAP - Submandibular gland       | % of control        | 100            | 36.9                      | 21.64        | 21.01                   | 8.179         | 7.941                    | 100%                 |
| LPO - Submandibular gland        | % of control        | 100            | 194.1                     | 31.79        | 41.4                    | 15.89         | 23.9                     | 99.91%               |
| Parenchyma - Parotid gland       | μm <sup>2</sup>     | 64563          | 58262                     | 4525         | 2460                    | 2613          | 1100                     | 93.32%               |
| Stroma - Parotid gland           | μm <sup>2</sup>     | 21980          | 28803                     | 1098         | 1469                    | 634.2         | 734.7                    | 100%                 |
| Acini - Parotid gland            | μm <sup>2</sup>     | 62676          | 55020                     | 5304         | 853.3                   | 3062          | 426.7                    | 98.08%               |
| Ducts - Parotid gland            | μm <sup>2</sup>     | 2325           | 2159                      | 1060         | 625.5                   | 611.8         | 279.7                    | 5.367%               |
| Parenchyma - Submandibular gland | μm <sup>2</sup>     | 69726          | 54543                     | 3830         | 3830                    | 1713          | 1564                     | 100%                 |
| Stroma - Submandibular gland     | μm <sup>2</sup>     | 4941           | 24263                     | 2457         | 3607                    | 1099          | 1473                     | 100%                 |
| Acini - Submandibular gland      | μm <sup>2</sup>     | 66660          | 50606                     | 4158         | 4682                    | 2079          | 1911                     | 100%                 |
| Ducts - Submandibular gland      | μm <sup>2</sup>     | 3002           | 4022                      | 571.9        | 625.1                   | 285.9         | 255.2                    | 92.68%               |

**Table S3:** Oxidative biochemistry assays (ACAP: Antioxidant Capacity Against Peroxyl Radicals and LPO: Lipid Peroxidation) and Morphometric analysis (Parenchyma, stroma, acini and ducts areas) values of the experimental study. Results are expressed as mean, SD: Standard deviation, SEM: Standard error of mean and Test Power (1-β error probability).
